# Supplementary material for: Non-alcoholic fatty liver disease and gestational diabetes mellitus: a bidirectional two-sample mendelian randomization study
Source: Springer Nature journal article supplement (doi:10.1186/s12902-024-01569-6), 2024-03-20
Supplement: MOESM1 [file 26883726]

**Non-alcoholic fatty liver disease and gestational diabetes mellitus : A  
bidirectional two-sample Mendelian randomization study**

| <b>Supplementary online information</b> |                                                                                                        |             |
|-----------------------------------------|--------------------------------------------------------------------------------------------------------|-------------|
| <b>Content</b>                          |                                                                                                        | <b>Page</b> |
| <b>Table S1.</b>                        | Characteristics of instrumental variables of NAFLD and <i>F</i> statistics                             | 2           |
| <b>Table S2.</b>                        | Characteristics of instrumental variables of GDM and <i>F</i> statistics                               | 2           |
| <b>Table S3.</b>                        | Mendelian randomization results of the causal effects of potential shared influencing factors on NAFLD | 3           |
| <b>Table S4.</b>                        | Mendelian randomization results of the causal effects of potential shared influencing factors on GDM   | 4           |
| <b>Figure S1.</b>                       | The result of leave-one-out sensitivity analysis of the causal effect of NAFLD on GDM                  | 5           |
| <b>Figure S2.</b>                       | The forest plot of the causal effect of NAFLD on GDM                                                   | 5           |
| <b>Figure S3.</b>                       | The scatter plot of the causal effect of NAFLD on GDM                                                  | 6           |
| <b>Figure S4.</b>                       | The result of leave-one-out sensitivity analysis of the causal effect of GDM on NAFLD                  | 6           |
| <b>Figure S5.</b>                       | The forest plot of the causal effect of GDM on NAFLD                                                   | 7           |
| <b>Figure S6.</b>                       | The scatter plot of the causal effect of GDM on NAFLD                                                  | 7           |

| <b>Table S1 Characteristics of instrumental variables of NAFLD and <i>F</i> statistics</b>                                      |                      |                     |            |             |           |                 |                 |
|---------------------------------------------------------------------------------------------------------------------------------|----------------------|---------------------|------------|-------------|-----------|-----------------|-----------------|
| <b>SNP</b>                                                                                                                      | <b>Effect allele</b> | <b>Other allele</b> | <b>EAF</b> | <b>Beta</b> | <b>SE</b> | <b><i>P</i></b> | <b><i>F</i></b> |
| rs17321515                                                                                                                      | G                    | A                   | 0.476097   | -0.15409    | 0.020931  | 1.81E-13        | 54.20           |
| rs182611493                                                                                                                     | G                    | A                   | 0.012616   | 0.453817    | 0.067899  | 2.33E-11        | 44.67           |
| rs2642442                                                                                                                       | T                    | C                   | 0.316965   | 0.13769     | 0.022383  | 7.67E-10        | 37.84           |
| rs3747207                                                                                                                       | A                    | G                   | 0.214703   | 0.369714    | 0.022649  | 6.74E-60        | 266.46          |
| rs429358                                                                                                                        | C                    | T                   | 0.156247   | -0.19922    | 0.029761  | 2.17E-11        | 44.81           |
| NAFLD, nonalcoholic fatty liver disease; SNP, single-nucleotide polymorphism; EAF, effect allele frequency; SE, standard error. |                      |                     |            |             |           |                 |                 |

| <b>Table S2 Characteristics of instrumental variables of GDM and <i>F</i> statistics</b>                                   |                      |                     |            |             |           |                 |                 |
|----------------------------------------------------------------------------------------------------------------------------|----------------------|---------------------|------------|-------------|-----------|-----------------|-----------------|
| <b>SNP</b>                                                                                                                 | <b>Effect allele</b> | <b>Other allele</b> | <b>EAF</b> | <b>Beta</b> | <b>SE</b> | <b><i>P</i></b> | <b><i>F</i></b> |
| rs34872471                                                                                                                 | C                    | T                   | 0.202724   | 0.161767    | 0.017049  | 2.35E-21        | 90.03           |
| rs7123869                                                                                                                  | C                    | T                   | 0.020088   | 0.295913    | 0.045894  | 1.14E-10        | 41.57           |
| rs7722200                                                                                                                  | C                    | T                   | 0.31561    | -0.14408    | 0.015255  | 3.56E-21        | 89.20           |
| rs7756992                                                                                                                  | G                    | A                   | 0.332859   | 0.102687    | 0.014676  | 2.62E-12        | 48.96           |
| rs9275373                                                                                                                  | A                    | G                   | 0.120313   | 0.158059    | 0.020838  | 3.32E-14        | 57.53           |
| GDM, gestational diabetes mellitus; SNP, single-nucleotide polymorphism; EAF, effect allele frequency; SE, standard error. |                      |                     |            |             |           |                 |                 |

**Table S3 Mendelian randomization results of the causal effects of potential shared influencing factors on NAFLD**

| Trait    | SNPs | IVW              |                | MR-Egger          |              | WM               |                | MR-PRESSO |                  |                | $P_{\text{pleiotropy}}$ | $P_{\text{heterogeneity}} (I^2)$ |
|----------|------|------------------|----------------|-------------------|--------------|------------------|----------------|-----------|------------------|----------------|-------------------------|----------------------------------|
|          |      | OR (95%CI)       | $P$            | OR (95%CI)        | $P$          | OR (95%CI)       | $P$            | SNPs      | OR (95%CI)       | $P$            |                         |                                  |
| BMI      | 436  | 1.93 (1.52-2.44) | < <b>0.001</b> | 2.26 (1.22-4.19)  | <b>0.009</b> | 2.06 (1.41-3.01) | < <b>0.001</b> | 436       | 1.93 (1.52-2.44) | < <b>0.001</b> | 0.580                   | <0.001 (19.61%)                  |
| WHR      | 27   | 2.87 (1.50-5.50) | <b>0.002</b>   | 9.93 (0.45-217.2) | 0.157        | 3.28 (1.49-7.25) | <b>0.003</b>   | 27        | 2.87 (1.50-5.50) | <b>0.002</b>   | 0.427                   | 0.061(31.57%)                    |
| TG       | 239  | 1.52 (1.25-1.86) | < <b>0.001</b> | 1.30 (0.97-1.75)  | 0.081        | 1.47 (1.10-1.96) | <b>0.009</b>   | 239       | 1.52 (1.25-1.86) | < <b>0.001</b> | 0.158                   | <0.001 (31.84%)                  |
| LDL-C    | 136  | 0.98 (0.77-1.25) | 0.893          | 0.80 (0.57-1.14)  | 0.225        | 0.93 (0.66-1.32) | 0.691          | 136       | 0.98 (0.77-1.25) | 0.893          | 0.127                   | 0.004 (26.16%)                   |
| HDL-C    | 272  | 0.70 (0.57-0.85) | < <b>0.001</b> | 0.72 (0.53-0.97)  | <b>0.032</b> | 0.73 (0.52-1.04) | 0.080          | 272       | 0.70 (0.57-0.85) | < <b>0.001</b> | 0.805                   | 0.007 (18.16%)                   |
| Apo A-1  | 230  | 0.71 (0.58-0.87) | < <b>0.001</b> | 0.67 (0.49-0.93)  | <b>0.017</b> | 0.69 (0.50-0.96) | <b>0.027</b>   | 230       | 0.71 (0.58-0.87) | < <b>0.001</b> | 0.670                   | 0.002 (23.08%)                   |
| Apo B    | 151  | 1.03 (0.84-1.27) | 0.764          | 0.81 (0.62-1.06)  | 0.132        | 0.79 (0.58-1.07) | 0.131          | 151       | 1.03 (0.84-1.27) | 0.764          | <b>0.008</b>            | <0.001 (29.15%)                  |
| HOMA-B   | 11   | 0.88 (0.32-2.43) | 0.801          | 2.20 (0.07-67.5)  | 0.663        | 1.31 (0.33-5.24) | 0.698          | 11        | 0.88 (0.32-2.43) | 0.801          | 0.594                   | 0.370 (7.71%)                    |
| HOMA-IR  | 6    | 1.67 (0.42-6.65) | 0.467          | 5.81 (0.05-636.6) | 0.504        | 0.87 (0.12-6.38) | 0.895          | 6         | 1.67 (0.42-6.65) | 0.467          | 0.613                   | 0.440 (0.00%)                    |
| TV       | 98   | 2.34 (1.21-4.50) | <b>0.011</b>   | 1.40 (0.05-37.91) | 0.843        | 2.44 (0.95-6.29) | 0.065          | 98        | 2.34 (1.21-4.50) | <b>0.011</b>   | 0.756                   | 0.300 (6.54%)                    |
| Computer | 70   | 0.84 (0.41-1.70) | 0.622          | 1.49 (0.03-74.3)  | 0.842        | 1.03 (0.37-2.88) | 0.957          | 70        | 0.84 (0.41-1.70) | 0.622          | 0.769                   | 0.339 (5.86%)                    |
| Driving  | 6    | 2.87 (0.26-31.3) | 0.388          | 0.00 (0.00-20804) | 0.327        | 4.47 (0.22-89.0) | 0.326          | 6         | 2.87 (0.26-31.3) | 0.388          | 0.292                   | 0.500 (0%)                       |

Abbreviations: NAFLD, nonalcoholic fatty liver disease; SNPs, single-nucleotide polymorphisms; IVW, Inverse Variance Weighted; WM, Weighted median; MR- PRESSO, Mendelian randomization pleiotropy residual sum and outlier; OR, odds ratio; BMI, body mass index; WHR, waist-to-hip ratio; TG, triglycerides; LDL-C, low-density lipoprotein cholesterol; HDL-C, high-density lipoprotein cholesterol; Apo A-1, apolipoprotein A-I; Apo B, apolipoprotein B; HOMA-B, homeostasis model assessment of beta-cell function; HOMA-IR, homeostasis model assessment of insulin resistance; TV, Time spent watching television; Computer, Time spent using computer; Driving, Time spent driving.

**Table S4 Mendelian randomization results of the causal effects of potential shared influencing factors on GDM**

| Trait    | SNPs | IVW              |                | MR-Egger          |                | WM               |                | MR-PRESSO |                  |                | <i>P</i> <sub>pleiotropy</sub> | <i>P</i> <sub>heterogeneity (I<sup>2</sup>)</sub> |
|----------|------|------------------|----------------|-------------------|----------------|------------------|----------------|-----------|------------------|----------------|--------------------------------|---------------------------------------------------|
|          |      | OR (95%CI)       | <i>P</i>       | OR (95%CI)        | <i>P</i>       | OR (95%CI)       | <i>P</i>       | SNPs      | OR (95%CI)       | <i>P</i>       |                                |                                                   |
| BMI      | 430  | 1.63 (1.46-1.82) | < <b>0.001</b> | 1.69 (1.26-2.25)  | < <b>0.001</b> | 1.74 (1.46-2.07) | < <b>0.001</b> | 430       | 1.63 (1.46-1.82) | < <b>0.001</b> | 0.806                          | <0.001 (31.86%)                                   |
| WHR      | 24   | 1.64 (1.23-2.38) | <b>0.010</b>   | 0.38 (0.03-4.08)  | 0.431          | 1.37 (0.90-2.10) | 0.139          | 24        | 1.64 (1.23-2.38) | <b>0.010</b>   | 0.234                          | 0.001 (53.13%)                                    |
| TG       | 238  | 1.27 (1.16-1.39) | < <b>0.001</b> | 1.05 (0.93-1.19)  | 0.429          | 1.09 (0.97-1.24) | 0.150          | 238       | 1.27 (1.16-1.39) | < <b>0.001</b> | <0.001                         | <0.001 (35.48%)                                   |
| LDL-C    | 135  | 0.95 (0.85-1.06) | 0.369          | 0.99 (0.84-1.16)  | 0.904          | 0.91 (0.78-1.07) | 0.271          | 135       | 0.95 (0.85-1.06) | 0.369          | 0.503                          | <0.001 (32.75%)                                   |
| HDL-C    | 274  | 0.77 (0.71-0.84) | < <b>0.001</b> | 0.84 (0.74-0.96)  | <b>0.014</b>   | 0.83 (0.72-0.96) | <b>0.017</b>   | 274       | 0.77 (0.71-0.84) | < <b>0.001</b> | 0.058                          | <0.001 (32.22%)                                   |
| Apo A-1  | 232  | 0.82 (0.75-0.90) | < <b>0.001</b> | 0.90 (0.78-1.03)  | 0.140          | 0.83 (0.72-0.95) | <b>0.008</b>   | 232       | 0.82 (0.75-0.90) | < <b>0.001</b> | 0.127                          | <0.001 (31.14%)                                   |
| Apo B    | 151  | 1.03 (0.94-1.13) | 0.488          | 1.04 (0.92-1.18)  | 0.509          | 1.08 (0.95-1.23) | 0.226          | 151       | 1.03 (0.94-1.13) | 0.488          | 0.831                          | <0.001 (30.54%)                                   |
| HOMA-B   | 5    | 0.57 (0.24-1.38) | 0.212          | 0.47 (0.00-246.2) | 0.827          | 0.61 (0.24-1.58) | 0.310          | 5         | 0.57 (0.24-1.38) | 0.212          | 0.953                          | 0.198 (33.47%)                                    |
| HOMA-IR  | 6    | 0.65 (0.36-1.17) | 0.151          | 0.72 (0.11-4.88)  | 0.750          | 0.75 (0.34-1.65) | 0.475          | 6         | 0.65 (0.36-1.17) | 0.151          | 0.918                          | 0.723 (0.00%)                                     |
| TV       | 98   | 1.57 (1.15-2.15) | <b>0.005</b>   | 2.43 (0.50-11.74) | 0.272          | 1.51 (1.01-2.26) | <b>0.045</b>   | 98        | 1.57 (1.15-2.15) | <b>0.005</b>   | 0.581                          | 0.022 (23.61%)                                    |
| Computer | 70   | 0.75 (0.54-1.05) | 0.096          | 0.87 (0.14-5.54)  | 0.884          | 0.67 (0.43-1.04) | 0.077          | 70        | 0.75 (0.54-1.05) | 0.096          | 0.875                          | 0.062 (21.53%)                                    |
| Driving  | 6    | 1.30 (0.16-10.7) | 0.809          | 0.00 (0.00-2036)  | 0.299          | 1.39 (0.25-7.66) | 0.703          | 6         | 1.30 (0.16-10.7) | 0.809          | 0.287                          | <0.001 (76.14%)                                   |

Abbreviations: GDM, gestational diabetes mellitus; SNPs, single-nucleotide polymorphisms; IVW, Inverse Variance Weighted; WM, Weighted median; MR- PRESSO, Mendelian randomization pleiotropy residual sum and outlier; OR, odds ratio; BMI, body mass index; WHR, waist-to-hip ratio; TG, triglycerides; LDL-C, low-density lipoprotein cholesterol; HDL-C, high-density lipoprotein cholesterol; Apo A-1, apolipoprotein A-I; Apo B, apolipoprotein B; HOMA-B, homeostasis model assessment of beta-cell function; HOMA-IR, homeostasis model assessment of insulin resistance; TV, Time spent watching television; Computer, Time spent using computer; Driving, Time spent driving.

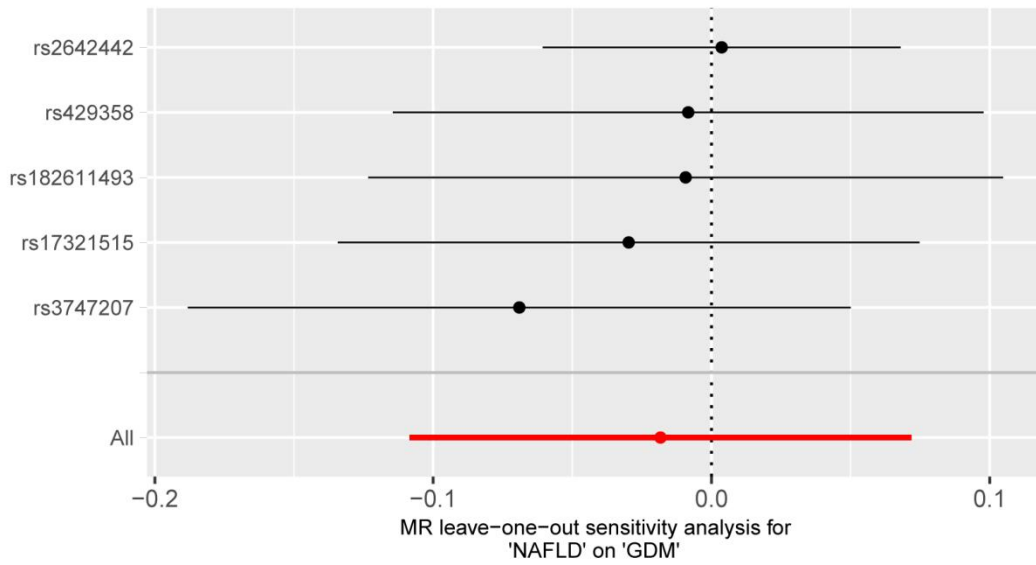

**Fig S1.** The result of leave-one-out sensitivity analysis of the causal effect of NAFLD on GDM

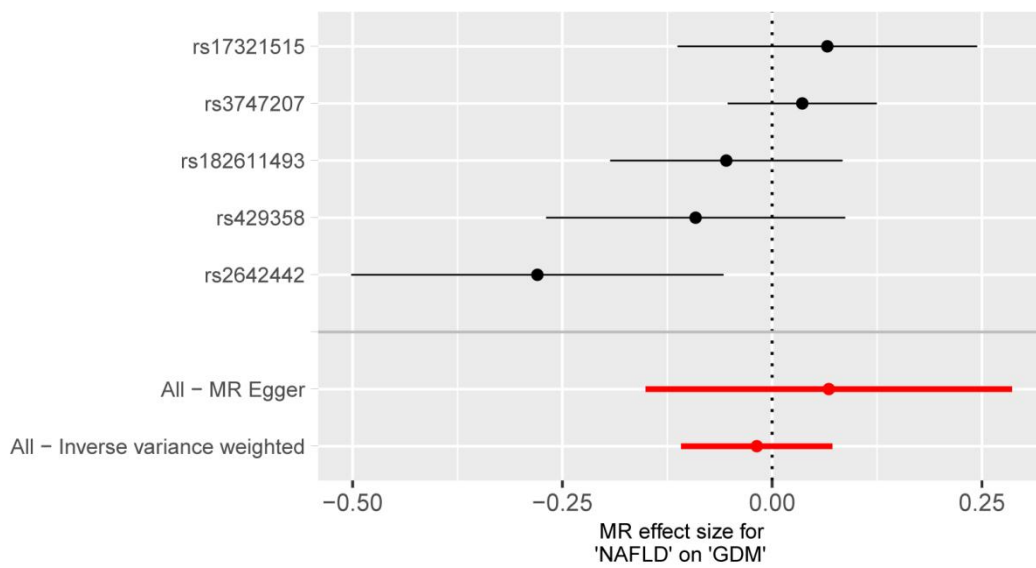

**Fig S2.** The forest plot of the causal effect of NAFLD on GDM

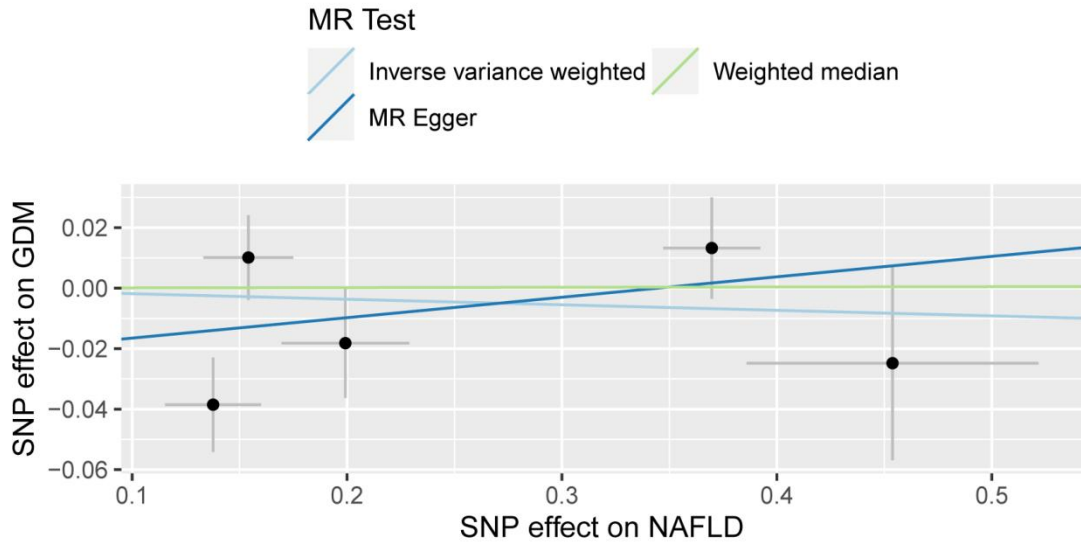

Fig S3. The scatter plot of the causal effect of NAFLD on GDM

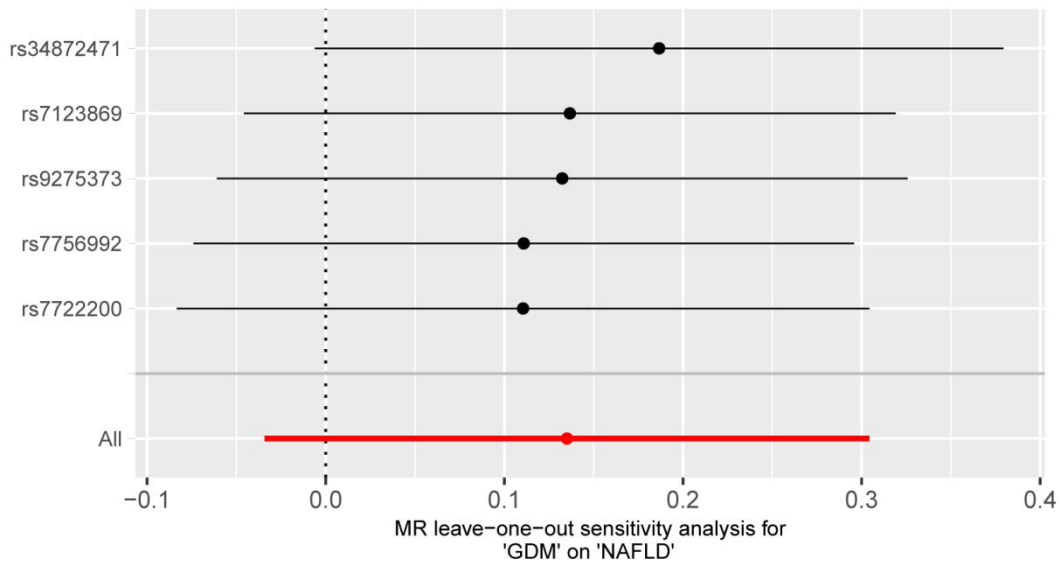

Fig S4. The result of leave-one-out sensitivity analysis of the causal effect of GDM on NAFLD

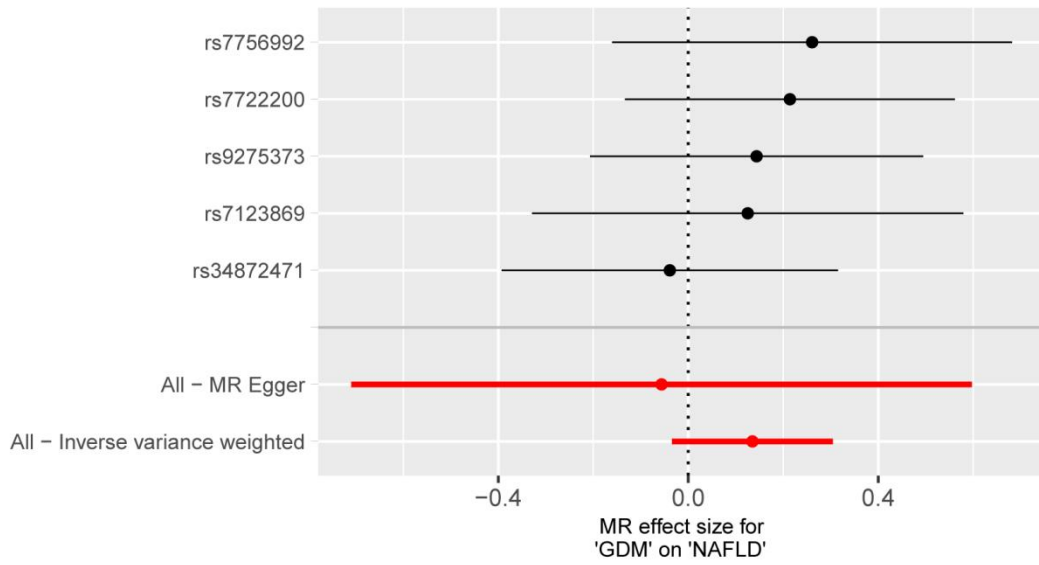

**Fig S5.** The forest plot of the causal effect of GDM on NAFLD

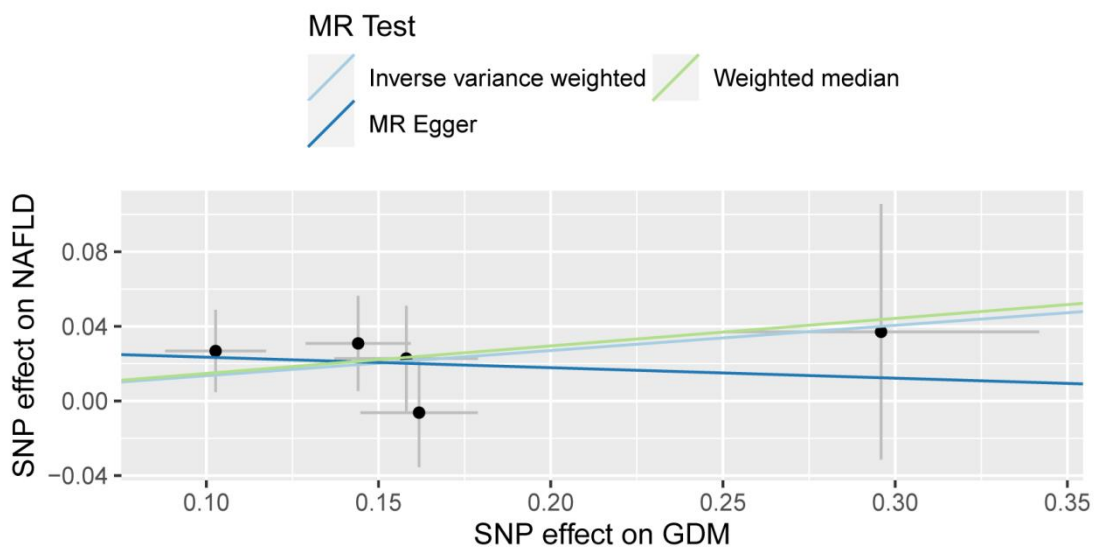

**Fig S6.** The scatter plot of the causal effect of GDM on NAFLD
